# Supplementary material for: Rhodamine based selective turn-on sensing of picric acid
Source: Royal Society of Chemistry journal article supplement (doi:10.1039/c4ra02931c), 2014-01-01
Supplement: c4ra02931c1.pdf [file c4ra02931c1.pdf]

## **Rhodamine based Selective Turn-on Sensing of Picric acid.**

**Gandhi sivaraman,<sup>\*a</sup> Balasubramnian Vidya, and Duraisamy Chellappa<sup>\*a</sup>**

*<sup>a</sup> School of chemistry, Madurai Kamaraj University, Madurai-625021.*

*E-mail: [raman474@gmail.com](mailto:raman474@gmail.com), [dcmku123@gmail.com](mailto:dcmku123@gmail.com).*

**Electronic Supporting Information**

**Materials and instrumental methods:**

All reagents and solvents were used without purification. Absorption measurements were carried out in JASCO V-550 UV-vis spectrophotometer. Fluorescence spectra were recorded in F-4500 Hitachi fluorescence spectrophotometer. The slit width was 5 nm for both excitation and emission. NMR spectra were recorded in Bruker (Avance) 300 MHz instrument using TMS as internal standard. ESI-MS spectral analysis was performed in positive ion as well as negative ion mode on a liquid chromatography-ion trap mass spectrometer (LCQ Fleet, Thermo Fisher Instruments Limited, US). Elemental analysis was carried out in a Perkin-Elmer 4100 elemental analyzer.

**Computational details:**

Density functional theory (DFT) calculations were carried out with B3LYP/6-311G basis set using Gaussian 09 program in order to understand the fluorescence enhancement of RDD-1 on addition of picric acid (PA) ions. The geometries of RDD-1 and RDD-1+PA were optimized by DFT-B3LYP using 6-311G basis sets. The TDDFT calculations on the optimized geometries of RDD-1 and RDD-1+PA complex using above basis sets were carried out to obtain the information about absorption change and corresponding transitions of RDD-1 and RDD-1 + PA. The MO's were plotted using Gaussview 05 with the isosurface value 0.05.

**Preparation of test Strips:**

A filter paper was immersed in the probe RDD-1 ( $5.0 \times 10^{-3}$  M) dissolved in acetonitrile -water (8:2) for 10 seconds and then dried in air. The test papers was again immersed into the picric acid containing aqueous solution for 1 min then air-dried in order to detect picric acid in real samples.

RDGS-48

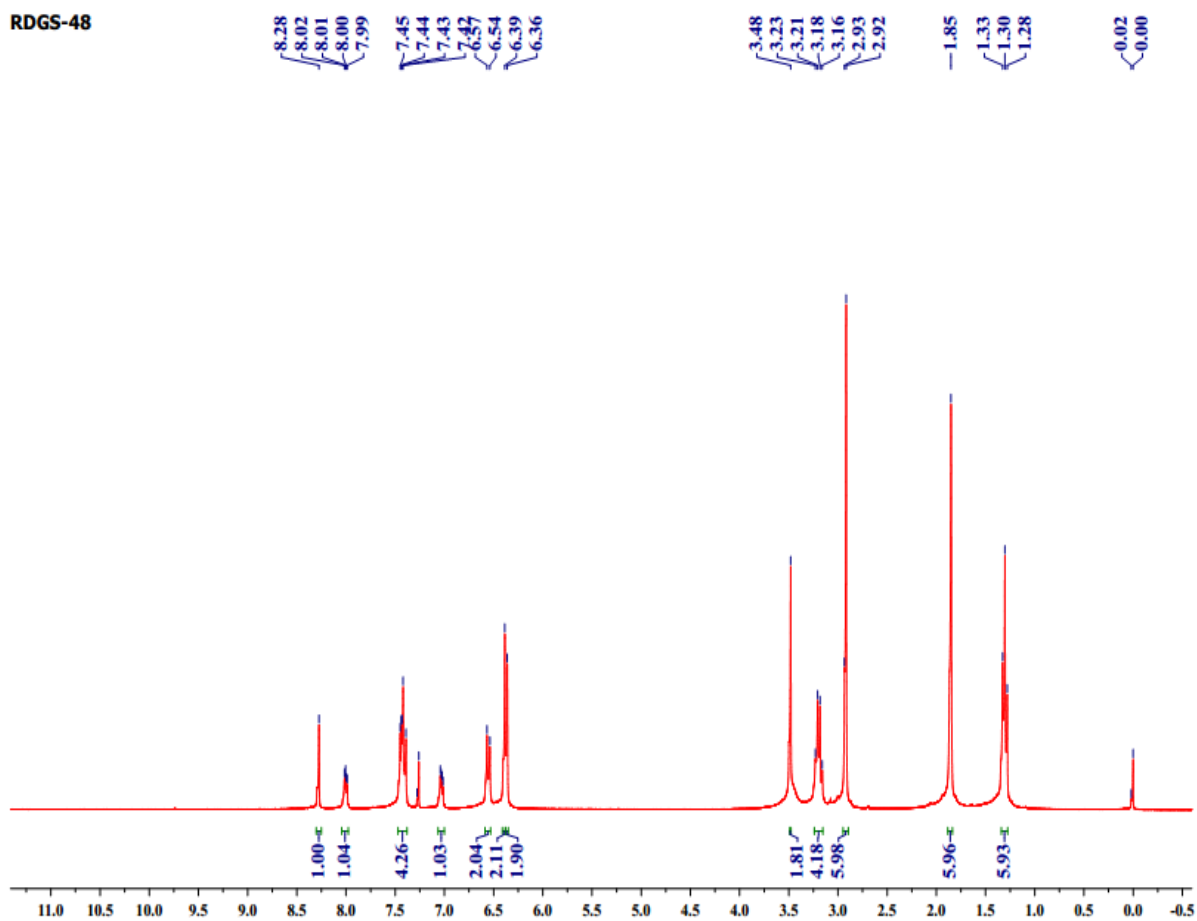

Figure S1: <sup>1</sup>H-nmr spectrum of RDD-1 in CDCl<sub>3</sub>

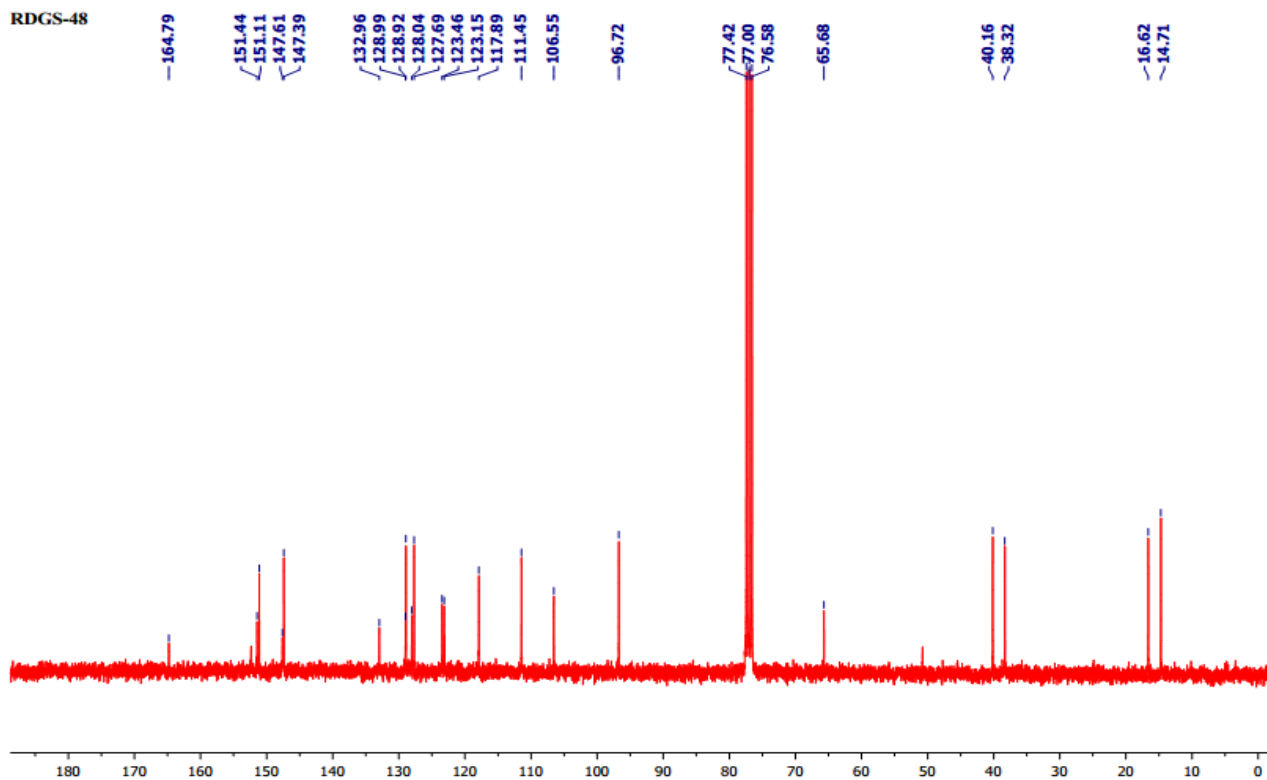

Figure-S2 :  $^{13}\text{C}$ -nmr spectrum of RDD-1 in  $\text{CDCl}_3$ .

RDD1 #41 RT: 0.54 AV: 1 NL: 3.26E4  
T: ITMS + c ESI Full ms [50.00-1000.00]

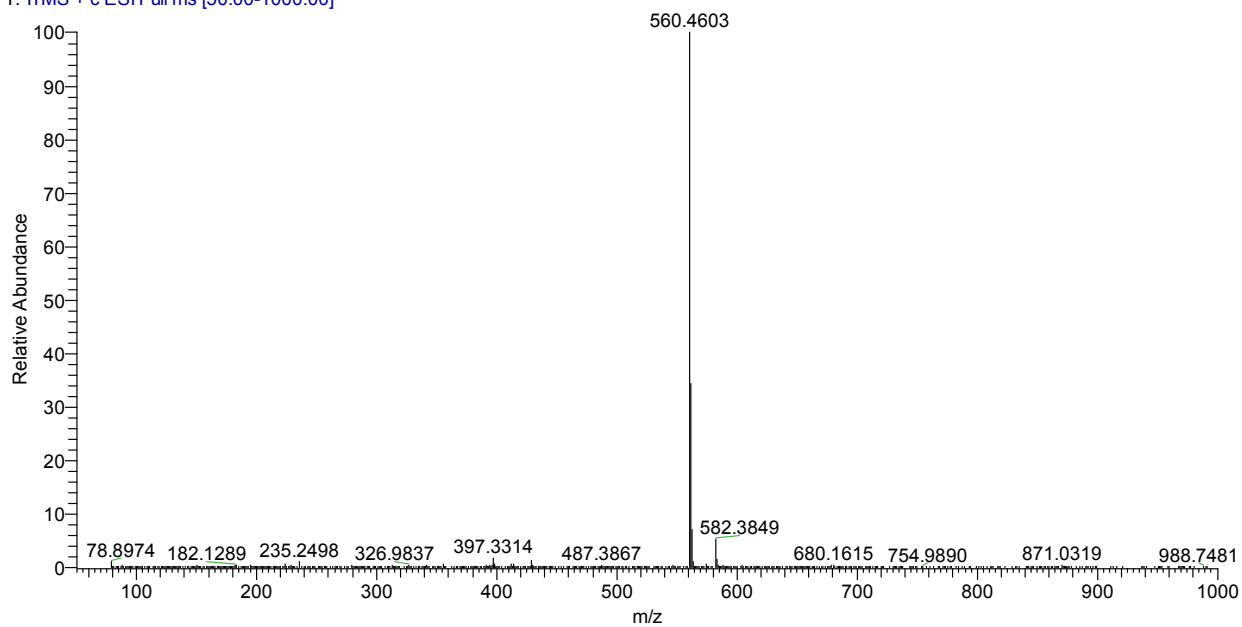

Figure-S3: ESI-MS spectrum of RDD-1.

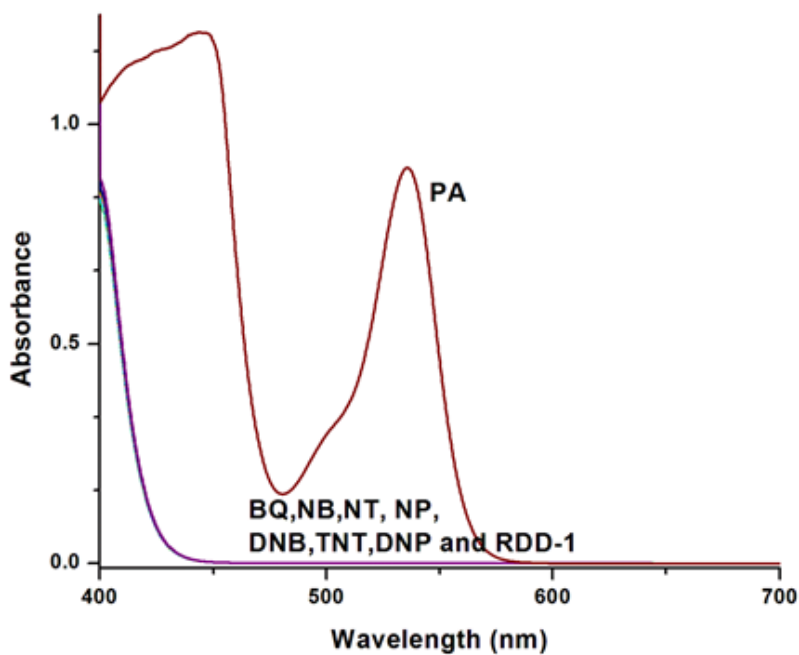

Figure-S4: UV-visible absorption spectra of RDD-1 in the presence of Nitro compounds (PA, BQ, NB, NT, NP, DNB, TNT, DNP ) in aqueous solution .

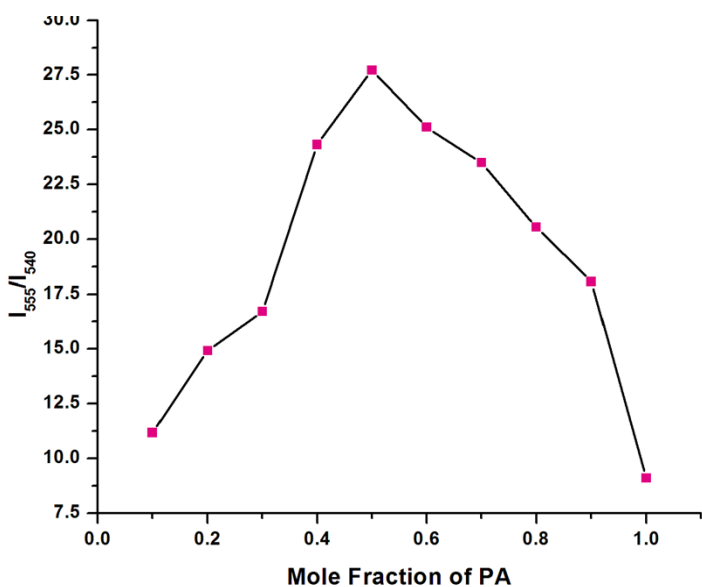

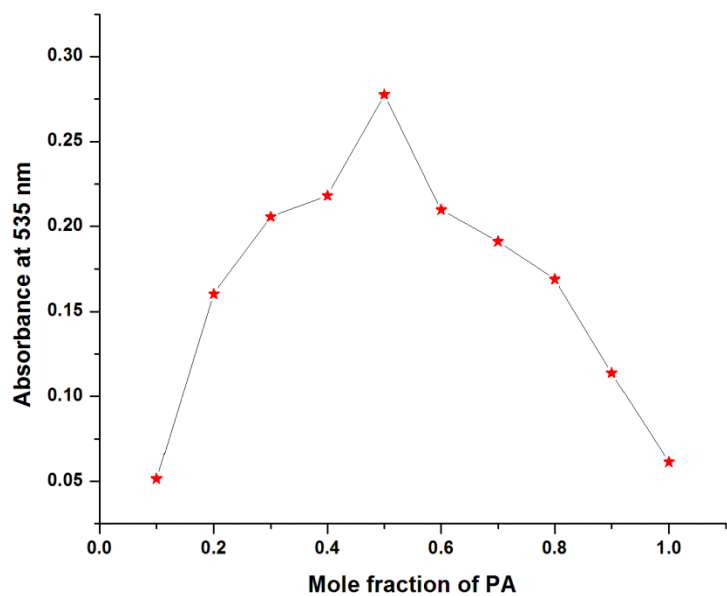

Figure-S5: Job's plot- (a) plot of Mole fraction of RDD-1 vs change of fluorescence intensity after addition of PA at  $\lambda_{Emm} = 555\text{nm}$  (b) plot of Mole fraction of RDD-1 vs change of absorbance after addition of PA at  $\lambda_{abs} = 535\text{ nm}$

RDPA #25 RT: 0.33 Av: 1 NL: 7.41E4  
T: ITMS + c ESI Full ms [50.00-1000.00]

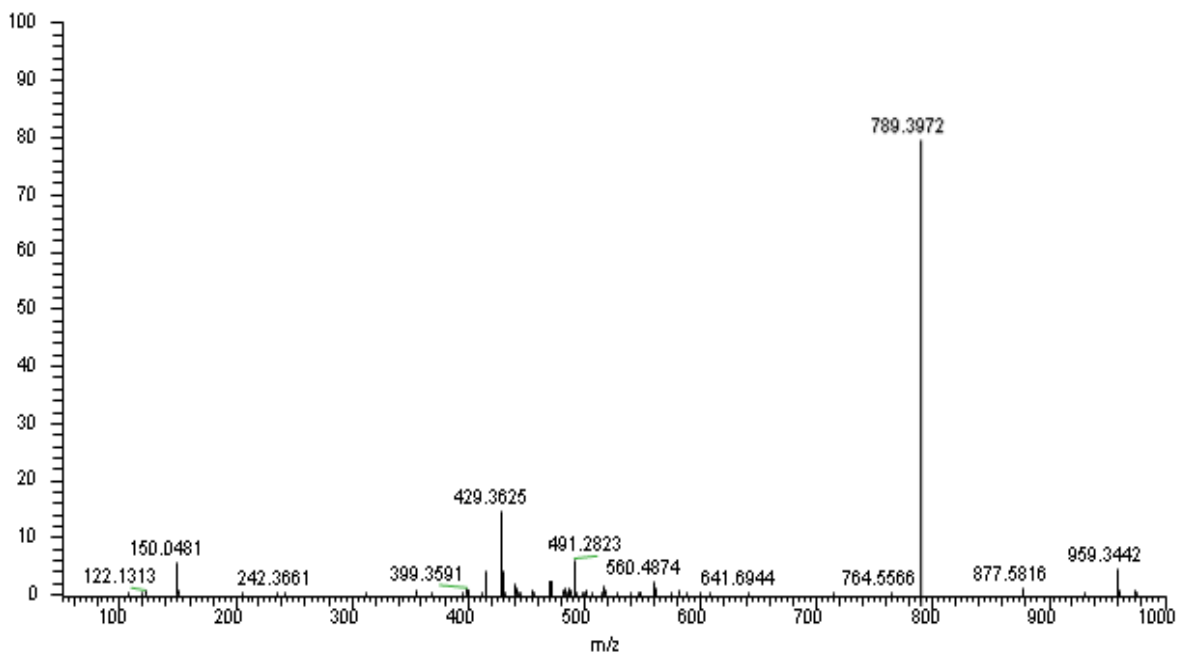

C41H40N8O9: C41 H40 N8 O9 pa Chrg 1

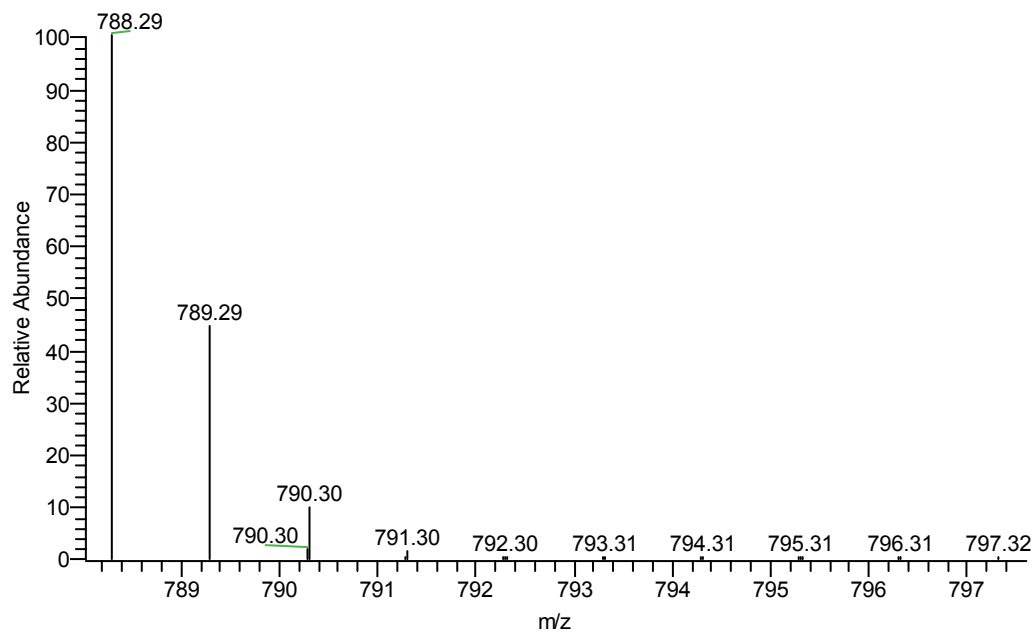

**Figure-S6: (a) observed ESI-MS spectrum of RDD-1 +PA . (b) stimulated ESI-MS spectrum of RDD-1 +PA**

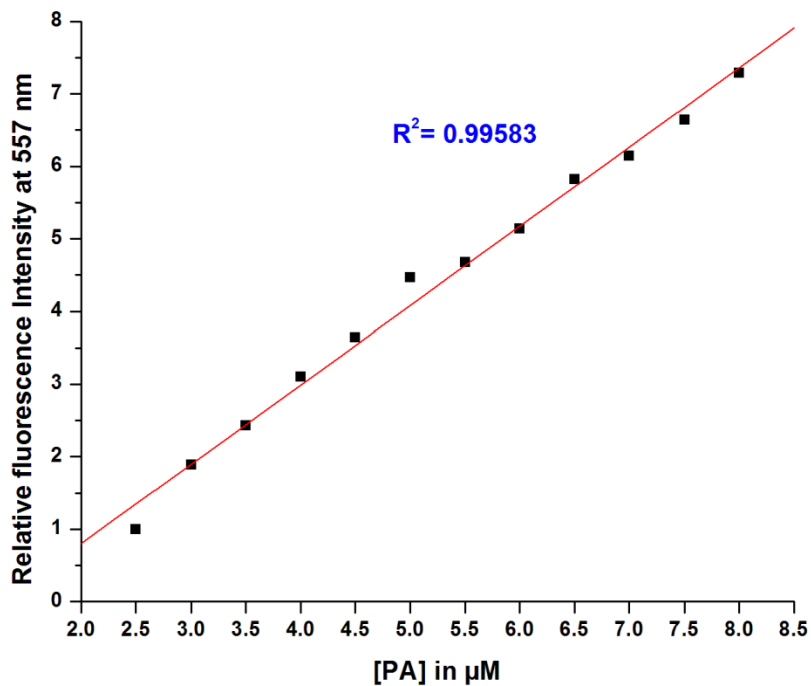

Figure-S7: plot of change of fluorescence intensity at  $\lambda_{\text{Emm}} = 557$  vs concentration of PA added to the probe RDD-1.

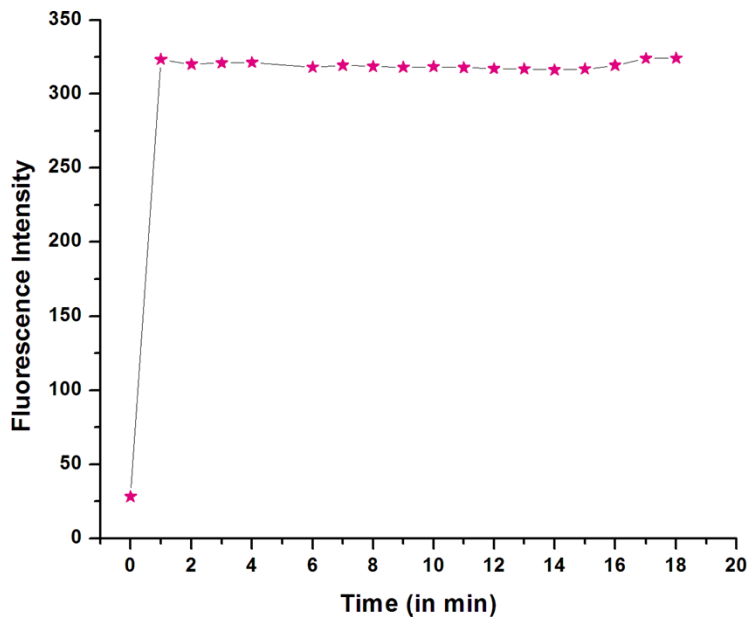

Figure- S8: Time dependent Fluorescence response of 1  $\mu\text{M}$  RDD-1 to PA.



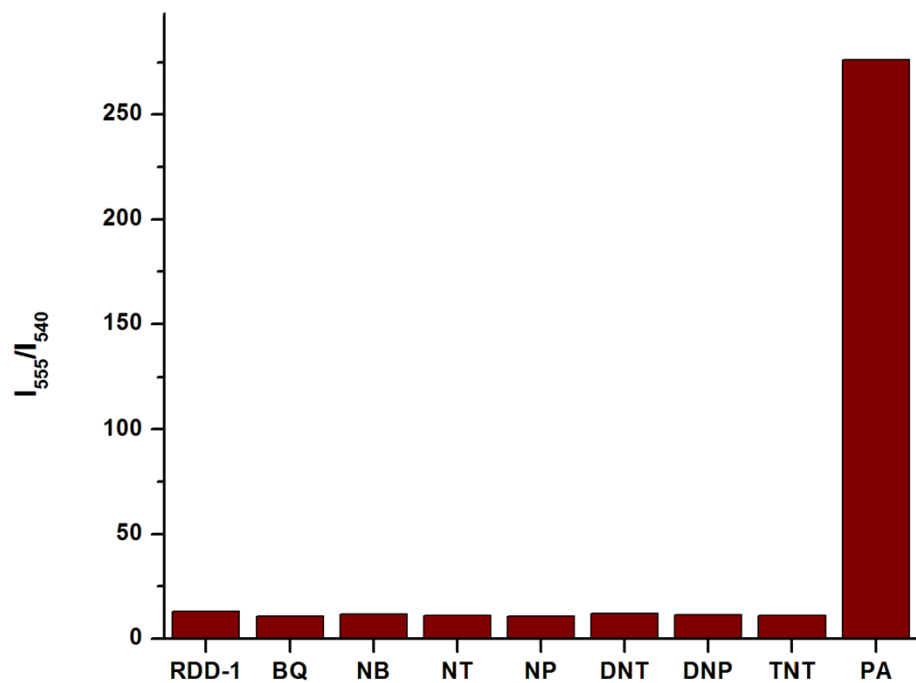

Fig- S9: Fluorescence response of 1  $\mu$ M RDD-1 to various NAC's.

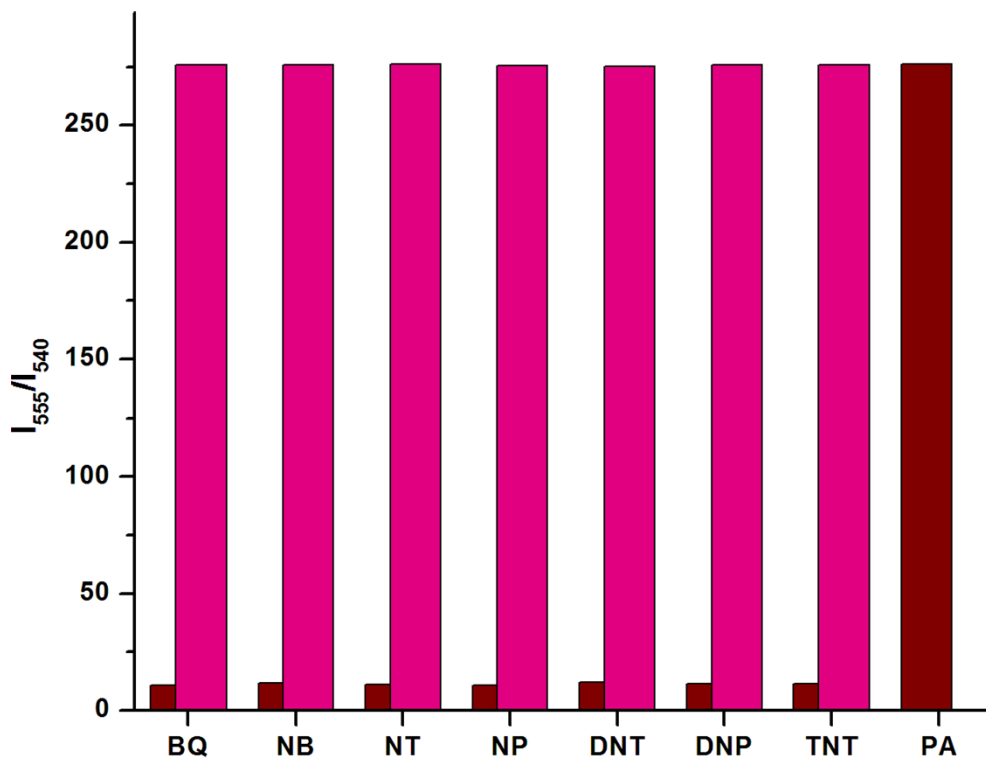

Figure-S10: Fluorescence response of RDD-1 (1  $\mu$ M) various NAC'S (Brown bar) and to the mixture of 10  $\mu$ M of tested NAC'S with 10  $\mu$ M PA (Pink).

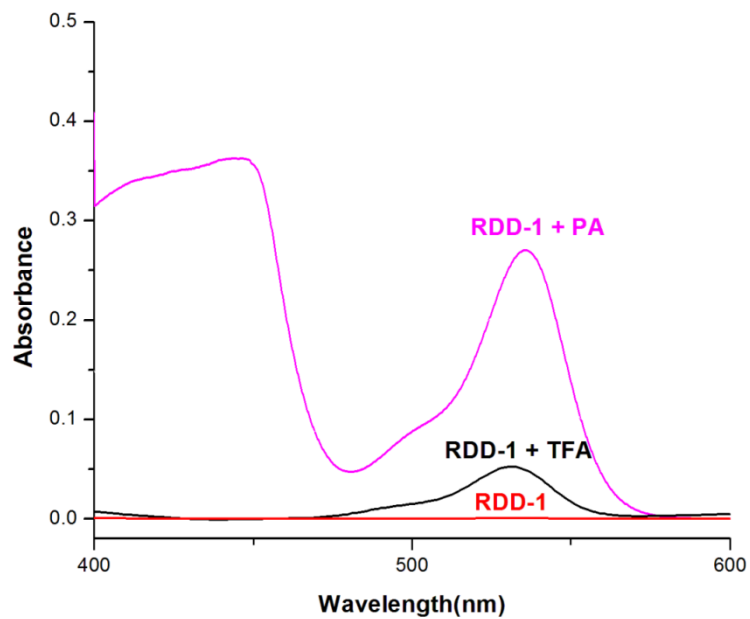

Figure-S11: Overlaid uv-Vis absorption spectra of RDD-1 with PA, TFA.

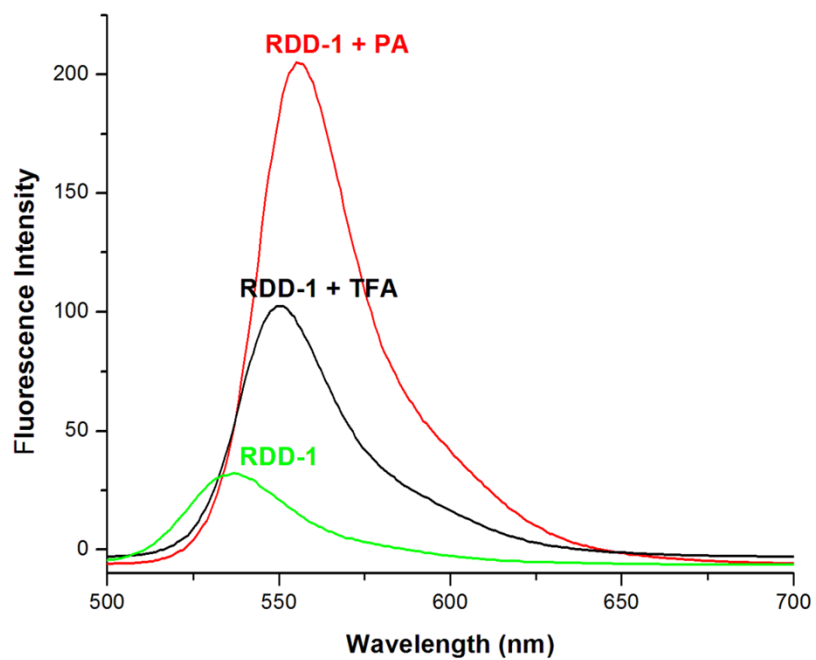

Figure-S12 : Overlaid Fluorescence Emission spectra of RDD-1 with PA, TFA (1 Equivalents) .

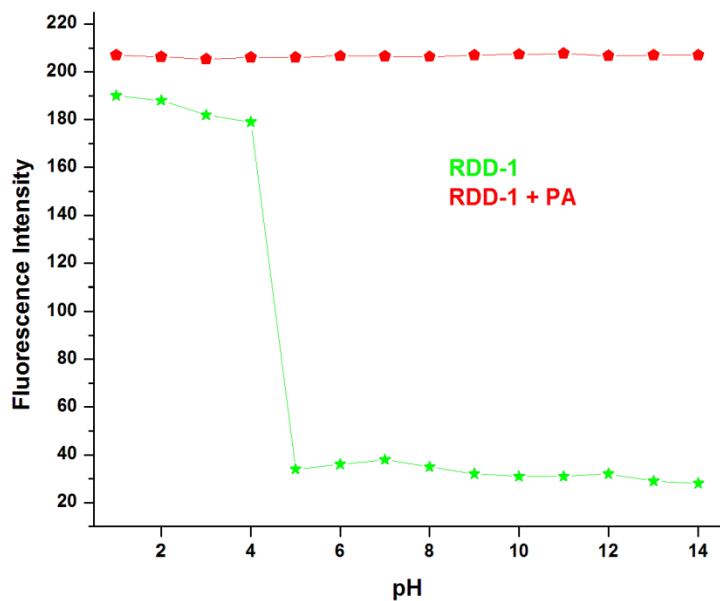

Figure-S13 : pH dependent Fluorescence Emission spectra of RDD-1 and RDD-1 with PA in different pH values.

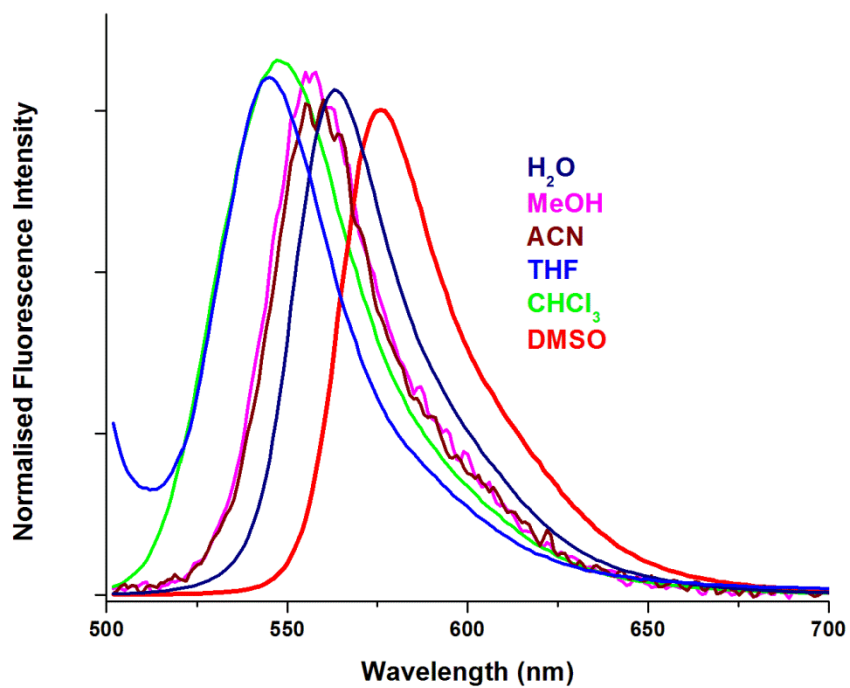

Figure-S14 : Overlaid normalized Fluorescence Emission spectra of RDD-1 with PA in different solvents.

Table-S1: transitions and corresponding oscillator strengths calculated from RDD\_1 and RDD-1 + PA using TDDFT/B3LYP-6-311G set.

**RDD-1:**

| <b>Transition</b> | <b>Oscillator strength (f)</b> |
|-------------------|--------------------------------|
| HOMO-LUMO         | 0.4955                         |
| HOMO-1 to LUMO    | 0.0026                         |
| HOMO- LUMO+2      | 0.0124                         |

**RDD-1+ PA-1:**

|               |        |
|---------------|--------|
| HOMO - LUMO   | 0.7870 |
| HOMO-1 - LUMO | 0.0006 |
| HOMO - LUMO+2 | 0.0004 |
